# Supplementary material
Source: Research Square preprint supplement (doi:10.21203/rs.3.rs-9473130/v1)
Supplement: Supplementary file 1 [file 5f74bd84d66ec63d99a7f6fa.docx]

# **SUPPLEMENTARY FILE S3: Data Extraction Template and Included Studies List**

## **S3.1 License Data Extraction Template**

| Field | Description | Coding Options |
| --- | --- | --- |
| Source ID | Unique identifier for the source | [Text] |
| Author/Year | First author and publication year | [Text] |
| License Name | Full name of license | CC BY / CC BY-SA / CC BY-NC / CC BY-ND / CC BY-NC-SA / CC BY-NC-ND / GPL / MIT / Apache / OGL / CC0 / ODbL / Other |
| Version | License version number | 1.0 / 2.0 / 2.5 / 3.0 / 4.0 / Other |
| Commercial Use | Does license permit commercial use? | Yes / No / Conditional |
| Modifications Allowed | Does license permit derivative works? | Yes / No / Conditional |
| Attribution Required | Is attribution required? | Yes / No |
| Share-Alike Required | Must derivatives use same license? | Yes / No / N/A |
| Dental Application Cited | Specific dental/orthodontic use described | [Text] |
| Jurisdiction | Legal jurisdiction discussed | US / UK / Canada / Australia / NZ / International / Other |
| Primary Source Type | Type of document | Statute / Case Law / License Text / Policy / Peer-Reviewed Article / Commentary |

## **S3.2 Government Work Data Extraction Template**

| Field | Description | Coding Options |
| --- | --- | --- |
| Source ID | Unique identifier for the source | [Text] |
| Author/Year | First author and publication year | [Text] |
| Jurisdiction | Country/State | US Federal / US State / UK / Canada / Australia / NZ / Other |
| Statutory Basis | Legal citation | [Text] |
| Employee Type | Type of government dental employee | Federal Dentist / Military Dentist / VA Dentist / IHS Dentist / PHS Dental Officer / State Dental School Faculty / NHS Dentist / Commonwealth Civil Servant / Other |
| Copyright Ownership | Who owns the copyright? | Government / Public Domain / Employee / Mixed / Other |
| Open License Available | Is there a standard open license? | Yes / No |
| Moral Rights | Are moral rights retained? | Yes / No / Limited / Not Specified |
| Geographic Scope | Where does the rule apply? | Domestic Only / International / Unspecified |
| Dental Context Provided | Does source specifically address dentistry? | Yes / No |

## **S3.3 Included Studies with Dental-Specific Content (n=18)**

| # | Citation | Topic Focus |
| --- | --- | --- |
| 1 | Schleyer T, Spallek H. J Dent Educ. 2014;78(3):345-52. | Copyright and open access in dental informatics |
| 2 | Hosseinpour S, et al. J Prosthet Dent. 2021;126(2):189-93. | Copyright considerations for 3D-printed dental models |
| 3 | British Orthodontic Society. J Orthod. 2023;50(2):156-62. | Copyright guidance for orthodontic clinical photography |
| 4 | Lavigne SE, Campbell SD. J Dent Educ. 2018;82(7):689-96. | Intellectual property in dental education |
| 5 | Rucker LM, Beeman CS. Dent Clin North Am. 2020;64(2):345-58. | Legal aspects of teledentistry: copyright and image sharing |
| 6 | Fernandez CC, Massey WL. J Am Dent Assoc. 2019;150(8):678-85. | Ownership of digital dental records: a copyright perspective |
| 7 | Kravitz ND, Kusnoto B. Am J Orthod Dentofacial Orthop. 2021;159(3):301-6. | 3D printing in orthodontics: legal and copyright issues |
| 8 | Ngan P, Moon W. Orthod Craniofac Res. 2022;25(4):512-20. | Open access publishing in orthodontics: journal policies |
| 9 | Papadopoulos MA. Eur J Orthod. 2020;42(5):477-82. | Copyright and ethical use of orthodontic images |
| 10 | Vaid NR, Doshi VM. Prog Orthod. 2024;25(1):8-17. | AI and copyright in orthodontic treatment planning |
| 11 | Will LA, Shelton C. J Dent Educ. 2019;83(9):1023-31. | Dental school intellectual property policies |
| 12 | Zerman N, Cavalleri G. Minerva Dent Oral Sci. 2021;70(6):289-95. | Radiographic images and copyright in dentistry |
| 13 | Liu J. J Sch Publ. 2021;52(4):210-28. | Open access mandates and copyright in dental journals |
| 14 | American Dental Association. ADA News. 2022;53(4):12-5. | ADA copyright and reprint policies |
| 15 | Canadian Dental Association. Guidelines. 2024. | Open Government Licence guidelines for dental professionals |
| 16 | British Dental Association. Good Practice Library. 2023. | Copyright guidance for dental professionals |
| 17 | Australian Dental Association. ADA News Bull. 2023;45(2):28-31. | Copyright guidelines for dental practitioners |
| 18 | Hao J, Nalley A, Yeung AWK, et al. NPJ Digit Med. 2025;8(1):412. | Characteristics, licensing, and ethical considerations of openly accessible oral-maxillofacial imaging datasets |

## **S3.4 Included License Sources (n=38)**

| Category | Count | Examples |
| --- | --- | --- |
| Creative Commons license documentation | 6 | CC BY, CC BY-SA, CC BY-NC, CC BY-ND, CC BY-NC-SA, CC BY-NC-ND |
| Free and open-source software licenses | 3 | GPL, MIT, Apache |
| Open data licenses | 2 | CC0, ODbL |
| Open Government Licences | 4 | UK OGL, Canada OGL, Australia AusGOAL, NZ NZGOAL |
| Peer-reviewed articles on licensing | 23 | Various authors |

## **S3.5 Included Government Ownership Sources (n=24)**

| Category | Count | Examples |
| --- | --- | --- |
| United States federal statutes | 3 | 17 U.S.C. § 105, Copyright Act |
| United States state statutes | 4 | Florida, Texas, California, New York |
| United States case law | 3 | Georgia v. [Public.Resource.Org](https://public.resource.org/), Feist Publications |
| Commonwealth statutes | 4 | UK CDPA 1988, Canada Copyright Act, Australia Copyright Act 1968 |
| Government policies | 6 | NIDCR policy, NHS guidelines |
| Peer-reviewed articles on government works | 4 | Samuelson, Hirtle, Greenleaf |

## **S3.6 Excluded Studies with Reasons (Representative Sample)**

| Study | Reason for Exclusion |
| --- | --- |
| French language article on dental copyright | Non-English source |
| Opinion piece on patent reform | No legal citation, opinion only |
| Trademark issues in dental branding | Patent/trademark only, not copyright |
| Independent contractor copyright in dentistry | Contractor works excluded per criteria |
| Spanish dental journal open access policies | Non-English source |
| General copyright overview without dental context | Dental topics unrelated to copyright |
