# Supplementary material
Source: Research Square preprint supplement (doi:10.21203/rs.3.rs-9473130/v1)
Supplement: Supplementary file 2 [file 8b56b2d8810d61520ef5e839.docx]

# **SUPPLEMENTARY FILE S1: PRISMA 2020 Checklist**

## **PRISMA 2020 Checklist for Systematic Reviews**

| Section and Topic | Item # | Checklist Item | Location in Manuscript | Page |
| --- | --- | --- | --- | --- |
| **TITLE** |  |  |  |  |
| Title | 1 | Identify the report as a systematic review. | Title page | 1 |
| **ABSTRACT** |  |  |  |  |
| Abstract | 2 | See the PRISMA 2020 for Abstracts checklist. | Abstract | 2 |
| **INTRODUCTION** |  |  |  |  |
| Rationale | 3 | Describe the rationale for the review in the context of existing knowledge. | Section 1.1 | 4 |
| Objectives | 4 | Provide an explicit statement of the objective(s) or question(s) the review addresses. | Section 1.2 | 4-5 |
| **METHODS** |  |  |  |  |
| Eligibility criteria | 5 | Specify the inclusion and exclusion criteria for the review and how studies were grouped for the syntheses. | Section 2.3 | 5 |
| Information sources | 6 | Specify all databases, registers, websites, organisations, reference lists and other sources searched or consulted to identify studies. Specify the date when each source was last searched or consulted. | Section 2.4 | 5-6 |
| Search strategy | 7 | Present the full search strategies for all databases, registers and websites, including any filters and limits used. | Section 2.4 & Supplementary File S2 | 5-6, Supp |
| Selection process | 8 | Specify the methods used to decide whether a study met the inclusion criteria of the review, including how many reviewers screened each record and each report retrieved, whether they worked independently, and if applicable, details of automation tools used in the process. | Section 2.5 | 6 |
| Data collection process | 9 | Specify the methods used to collect data from reports, including how many reviewers collected data from each report, whether they worked independently, any processes for obtaining or confirming data from study investigators, and if applicable, details of automation tools used in the process. | Section 2.5 | 6 |
| Data items | 10a | List and define all outcomes for which data were sought. Specify whether all results that were compatible with each outcome domain in each study were sought, and if not, the methods used to decide which results to collect. | Section 2.5 | 6 |
|  | 10b | List and define all other variables for which data were sought. Describe any assumptions made about any missing or unclear information. | Section 2.5 | 6 |
| Study risk of bias assessment | 11 | Specify the methods used to assess risk of bias in the included studies, including details of the tool(s) used, how many reviewers assessed each study and whether they worked independently, and if applicable, details of automation tools used in the process. | Section 2.6 | 6-7 |
| Effect measures | 12 | Specify for each outcome the effect measure(s) used in the synthesis or presentation of results. | N/A (Legal doctrinal review) | — |
| Synthesis methods | 13a | Describe the processes used to decide which studies were eligible for each synthesis. | Section 2.7 | 7 |
|  | 13b | Describe any methods required to prepare the data for presentation or synthesis. | Section 2.7 | 7 |
|  | 13c | Describe any methods used to tabulate or visually display results of individual studies and syntheses. | Section 2.7 | 7 |
|  | 13d | Describe any methods used to synthesize results and provide a rationale for the choice(s). | Section 2.7 | 7 |
|  | 13e | Describe any methods used to explore possible causes of heterogeneity among study results. | N/A | — |
|  | 13f | Describe any sensitivity analyses conducted to assess robustness of the synthesized results. | N/A | — |
| Reporting bias assessment | 14 | Describe any methods used to assess risk of bias due to missing results in a synthesis. | Section 2.6 | 6-7 |
| Certainty assessment | 15 | Describe any methods used to assess certainty in the body of evidence for an outcome. | Section 2.6 | 6-7 |
| **RESULTS** |  |  |  |  |
| Study selection | 16a | Describe the results of the search and selection process, from the number of records identified in the search to the number of studies included in the review, ideally using a flow diagram. | Section 3.1 & Figure 1 | 7-8 |
|  | 16b | Cite studies that might appear to meet the inclusion criteria, but which were excluded, and explain why they were excluded. | Section 3.1 | 7-8 |
| Study characteristics | 17 | Cite each included study and present its characteristics. | Sections 3.2, 3.3 | 8-11 |
| Risk of bias in studies | 18 | Present assessments of risk of bias for each included study. | Section 2.6 | 6-7 |
| Results of individual studies | 19 | For all outcomes, present, for each study, summary statistics where appropriate, ideally using structured tables or plots. | Tables 1-3 | 8, 12 |
| Results of syntheses | 20a | For each synthesis, briefly summarise the characteristics and risk of bias among contributing studies. | Section 4.1 | 11-12 |
|  | 20b | Present results of all syntheses conducted. | N/A (Narrative) | — |
|  | 20c | Present results of all investigations of possible causes of heterogeneity among study results. | N/A | — |
|  | 20d | Present results of all sensitivity analyses conducted. | N/A | — |
| Reporting biases | 21 | Present assessments of risk of bias due to missing results for each synthesis assessed. | Section 4.5 | 13 |
| Certainty of evidence | 22 | Present assessments of certainty in the body of evidence for each outcome assessed. | Section 4.5 | 13 |
| **DISCUSSION** |  |  |  |  |
| Discussion | 23a | Provide a general interpretation of the results in the context of other evidence. | Section 4.1 | 11-12 |
|  | 23b | Discuss any limitations of the evidence included in the review. | Section 4.5 | 13 |
|  | 23c | Discuss any limitations of the review processes used. | Section 4.5 | 13 |
|  | 23d | Discuss implications of the results for practice, policy, and future research. | Sections 4.2, 4.3, 4.4 | 12-13 |
| **OTHER INFORMATION** |  |  |  |  |
| Registration and protocol | 24a | Provide registration information for the review, or state that the review was not registered. | Section 2.1 | 5 |
|  | 24b | Indicate where the review protocol can be accessed, or state that a protocol was not prepared. | Section 2.1 | 5 |
|  | 24c | Describe and explain any amendments to information provided at registration or in the protocol. | N/A | — |
| Support | 25 | Describe sources of financial or non-financial support for the review. | Funding Statement | 1 |
| Competing interests | 26 | Declare any competing interests of review authors. | Conflict of Interest | 1 |
| Availability of data, code and other materials | 27 | Report which of the following are publicly available and where they can be found. | Supplementary Files | Supp |

**Adapted from:** Page MJ, McKenzie JE, Bossuyt PM, Boutron I, Hoffmann TC, Mulrow CD, et al. The PRISMA 2020 statement: an updated guideline for reporting systematic reviews. BMJ. 2021;372:n71.
