# Supplementary material
Source: Research Square preprint supplement (doi:10.21203/rs.3.rs-9473130/v1)
Supplement: Supplementary file 3 [file 997d68538d6b365dae279314.docx]

# **SUPPLEMENTARY FILE S4: Extended Legal Analysis of Government Works**

## **S4.1 United States Federal Government Works**

### **Statutory Text (17 U.S.C. § 105)**

"Copyright protection under this title is not available for any work of the United States Government, but the United States Government is not precluded from receiving and holding copyrights transferred to it by assignment, bequest, or otherwise."

### **Key Interpretive Case Law**

**Georgia v.** [**Public.Resource.Org**](https://public.resource.org/)**, Inc., 590 U.S. ___ (2020)**

The U.S. Supreme Court held that the government edicts doctrine—which places certain government works in the public domain—applies to non-binding explanatory materials created by judges and legislators acting in their official capacities. However, the Court distinguished between works created by government officials acting as legislators/judges (public domain) and works created by government employees generally (governed by § 105).

**Feist Publications, Inc. v. Rural Telephone Service Co., 499 U.S. 340 (1991)**

Established the minimal originality threshold for copyright protection. Works lacking creative spark or originality do not qualify for copyright protection, regardless of effort expended.

### **Application to Dental Practice Settings**

| Setting | Employee Type | Copyright Status | Practical Implication |
| --- | --- | --- | --- |
| VA Medical Center | VA Staff Dentist | Public Domain | Clinical protocols, patient education materials freely reproducible |
| Military Dental Corps | Active Duty Military Dentist | Public Domain | Research publications, treatment protocols in public domain |
| Indian Health Service | IHS Dental Officer | Public Domain | Community oral health materials freely distributable |
| USPHS Commissioned Corps | PHS Dental Officer | Public Domain | Public health guidelines have no copyright restrictions |
| NIDCR/NIH | Federal Researcher | Public Domain | Published research, datasets in public domain |

## **S4.2 Commonwealth Crown Copyright**

### **United Kingdom**

**Statutory Basis:** Copyright, Designs and Patents Act 1988, s. 163

**Duration of Crown Copyright:**

- Published works: 50 years from publication
- Unpublished works: 125 years from creation

**Open Government Licence (OGL) v3.0**

| Permission | Status |
| --- | --- |
| Copy, publish, distribute, transmit | Permitted |
| Adapt the work | Permitted |
| Commercial use | Permitted |
| Attribution required | Required |
| Sublicensing | Not permitted |
| Use of departmental logos/crests | Excluded |

### **Canada**

**Statutory Basis:** Copyright Act, R.S.C. 1985, c. C-42, s. 12
**Open Government Licence – Canada:** Similar to UK OGL, permits free reuse with attribution.

### **Australia**

**Statutory Basis:** Copyright Act 1968 (Cth), Part VII
**Duration:** 50 years from publication
**Framework:** Australian Government Open Access and Licensing Framework (AusGOAL) recommends CC BY as default.

### **New Zealand**

**Statutory Basis:** Copyright Act 1994, Part 5
**Framework:** New Zealand Government Open Access and Licensing (NZGOAL) recommends CC BY 4.0 as default.

## **S4.3 U.S. State Government Works: Jurisdictional Variations**

| State | General Rule | Statutory/Common Law Basis | Dental School Implication |
| --- | --- | --- | --- |
| Florida | Public records in public domain | Fla. Stat. § 119.01 | University of Florida dental faculty works may be public domain |
| Texas | Government works not copyrightable | Tex. Gov't Code § 552.003 | UT Health dental school works may be public domain |
| California | State may hold copyright | Cal. Gov't Code § 6250 et seq. | UCSF/UCLA dental faculty should consult IP policies |
| New York | State claims copyright | NY Pub. Off. Law § 87 | SUNY dental faculty should consult IP policies |
| Massachusetts | Case-by-case determination | Common law | Harvard dental (private) not affected |
| Michigan | State may hold copyright | MCL § 15.231 | University of Michigan dental faculty consult policies |

## **S4.4 Moral Rights in Government Works: Comparative Table**

| Jurisdiction | Moral Rights for Government Employees? | Scope |
| --- | --- | --- |
| United States | Limited (VARA only applies to visual art) | No attribution/integrity right for government works generally |
| United Kingdom | Excluded for Crown copyright works (CDPA 1988, s. 79) | Government may modify without author consent |
| Canada | Retained for authors, waivable | Authors retain paternity/integrity unless waived |
| Australia | Retained, but limited remedies | Moral rights exist but government may have defenses |
| France | Perpetual, inalienable, imprescriptible | Cannot be waived even for government works |
| Germany | Core rights inalienable | Author retains attribution/integrity regardless of employment |
| Brazil | Inalienable, perpetual (Law 9,610/98, Art. 24) | Author retains moral rights even in public domain works |
