# Supplementary material
Source: Research Square preprint supplement (doi:10.21203/rs.3.rs-9473130/v1)
Supplement: Supplementary file 4 [file b3d67e6d501730153ae52a7b.docx]

# **SUPPLEMENTARY FILE S5: Glossary of Legal Terms**

| Term | Definition |
| --- | --- |
| **Attribution** | The requirement to credit the original creator when using a copyrighted work. |
| **CC (Creative Commons)** | A nonprofit organization providing standardized copyright licenses for creative works. |
| **CC0** | Creative Commons "No Rights Reserved" public domain dedication tool. |
| **Copyleft** | A licensing approach requiring derivative works to be distributed under the same or compatible license terms (e.g., GPL). |
| **Copyright** | The exclusive legal right to reproduce, publish, sell, or distribute an original work of authorship. |
| **Crown Copyright** | Copyright protection for works created by the UK, Canadian, Australian, or New Zealand governments or their employees. |
| **Derivative Work** | A new work based upon or adapted from an existing copyrighted work (e.g., cropped radiograph, translated article). |
| **Doctrinal Legal Research** | Research that analyzes legal rules, principles, and doctrines as found in statutes and case law, rather than empirical data. |
| **FOSS** | Free and Open Source Software. Software licensed under terms that permit use, modification, and redistribution. |
| **GPL** | GNU General Public License. A widely used copyleft open source software license. |
| **HIPAA** | Health Insurance Portability and Accountability Act (U.S.). Governs patient privacy, distinct from copyright. |
| **Intellectual Property** | Legal rights protecting creations of the mind, including copyright, patents, trademarks, and trade secrets. |
| **License** | Permission granted by the copyright holder to use a work in specified ways. |
| **MIT License** | A permissive open source software license allowing proprietary reuse with minimal restrictions. |
| **Moral Rights** | Rights of attribution and integrity that protect the personal connection between an author and their work; separate from economic copyright. |
| **OGL** | Open Government Licence. Standard license for Crown copyright works in the UK, Canada, and other Commonwealth countries. |
| **Open Access** | Free, immediate, online availability of research articles with full reuse rights. |
| **Originality Threshold** | The minimal degree of creativity required for a work to qualify for copyright protection (Feist standard in U.S.). |
| **Public Domain** | The body of creative works not protected by copyright, freely usable by anyone for any purpose. |
| **Share-Alike (SA)** | A license condition requiring derivative works to be distributed under the same license terms as the original. |
| **Statutory License** | A compulsory license established by law that permits certain uses of copyrighted works without the copyright owner's permission, subject to payment of royalties. |
| **Work Made for Hire** | A work created by an employee within the scope of employment, or a specially commissioned work, where the employer or commissioning party is considered the legal author and copyright owner. |
