# Supplementary material
Source: Research Square preprint supplement (doi:10.21203/rs.3.rs-9473130/v1)
Supplement: Supplementary file 5 [file c72e623e292eb596c9486466.docx]

# **SUPPLEMENTARY FILE S2: Complete Search Strategies by Database**

## **S2.1 PubMed Search Strategy**

**Date searched:** January 30, 2026
**Date range:** January 1, 2000 – January 31, 2026
**Filters applied:** English language
**Results retrieved:** 43 records

**Search string:**

(copyright OR "copyright ownership" OR "copyright license" OR "Creative Commons" OR "open access license") AND (dental OR orthodontic OR radiograph OR "CBCT" OR "intraoral photo" OR "stl file" OR "3D scan") AND (law OR legal OR ownership OR classification OR "public domain" OR "Crown copyright")

## **S2.2 Google Scholar Search Strategy**

**Date searched:** January 30, 2026
**Date range:** 2000–2026 (Custom range filter applied)
**Results retrieved:** Approximately 422,000 total results
**Results screened:** First 200 (sorted by relevance)

**Search string:**

("copyright" OR "Creative Commons" OR "open access license" OR "open source license") AND (dental OR orthodontic OR dentistry) AND (license OR ownership OR legal)

**Note:** Google Scholar does not provide systematic export functionality; screening was limited to the most relevant results.

## **S2.3 OpenAlex Search Strategy**

**Date searched:** January 30, 2026
**API endpoint:** <https://api.openalex.org/works>
**Filters:** publication_year:2000-2026, language:en
**Results retrieved:** 78,620 total works
**Results screened:** First 200 (relevance-sorted)

**Search string:**

(copyright OR "open source license" OR "Creative Commons" OR "copyleft") AND (dental OR orthodontic OR software OR licensing)

## **S2.4 BASE Search Strategy**

**Date searched:** January 30, 2026
**Document types:** Article, Book, Report, Thesis
**Results retrieved:** 26,585,324 total documents
**Results screened:** First 100 (relevance-sorted)

**Search string:**

(copyright OR "Creative Commons" OR "open source license") AND (dental OR orthodontic OR software OR licensing)

## **S2.5 CORE Search Strategy**

**Date searched:** January 30, 2026
**Filters:** Published 2000-2026, English language, Full text available
**Results retrieved:** 2,091,080 total works
**Results screened:** First 100 (relevance-sorted)

**Search string:**

(copyright OR "open source license" OR "Creative Commons" OR "copyleft") AND (dental OR orthodontic OR software OR licensing)

## **S2.6 SSRN Search Strategy**

**Date searched:** January 30, 2026
**Database:** Legal Scholarship Network (LSN)
**Results retrieved:** 1 record

**Search string:**

(copyright OR intellectual property) AND (dental OR dentist OR orthodontic)

## **S2.7 WIPO Lex Search Strategy**

**Date searched:** January 30, 2026
**Jurisdictions:** United States, United Kingdom, Canada, Australia, New Zealand
**Results retrieved:** 2 web page results

**Search terms:**

- "government work"
- "public domain"
- "Crown copyright"

## **S2.8 Government Legal Portals**

### [**congress.gov**](https://congress.gov/) **(U.S. Legislation)**

**Date searched:** January 30, 2026
**Search terms:** "17 USC 105", "copyright government works", "public domain federal employee"

### [**legislation.gov.uk**](https://legislation.gov.uk/) **(UK Legislation)**

**Date searched:** January 30, 2026
**Search terms:** "Copyright, Designs and Patents Act 1988", "Crown copyright", "Open Government Licence"

### [**laws-lois.justice.gc.ca**](https://laws-lois.justice.gc.ca/) **(Canada Legislation)**

**Date searched:** January 30, 2026
**Search terms:** "Copyright Act", "Crown copyright", "Open Government Licence Canada"

### [**legislation.gov.au**](https://legislation.gov.au/) **(Australia Legislation)**

**Date searched:** January 30, 2026
**Search terms:** "Copyright Act 1968", "Crown copyright", "Commonwealth copyright"

## **S2.9 Summary of Search Results**

| Database | Search Date | Total Results | Records Screened |
| --- | --- | --- | --- |
| PubMed | Jan 30, 2026 | 43 | 43 (all) |
| Google Scholar | Jan 30, 2026 | ~422,000 | 200 |
| OpenAlex | Jan 30, 2026 | 78,620 | 200 |
| BASE | Jan 30, 2026 | 26,585,324 | 100 |
| CORE | Jan 30, 2026 | 2,091,080 | 100 |
| SSRN | Jan 30, 2026 | 1 | 1 (all) |
| WIPO Lex | Jan 30, 2026 | 2 | 2 (all) |
| Reference lists | N/A | N/A | 376 |
| **Total Screened** |  |  | **1,022** |
